# Supplementary material for: Alumina Ceramic Exacerbates the Inflammatory Disease by Activation of Macrophages and T Cells
Source: MDPI journal article supplement (doi:10.3390/ijms21197114), 2020-09-26
Supplement: s1 [file s1]

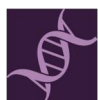

Supporting information for

# Alumina Ceramic Exacerbates the Inflammatory Disease by Activation of Macrophages and T cells

Seong-Min Lim<sup>1,2,3</sup>, Juyoung Hwang<sup>1,2,3</sup>, Hae-Bin Park<sup>1,2,3</sup>, Chan Ho Park<sup>4,\*</sup> and Jun-O Jin<sup>1,2,3\*</sup>

<sup>1</sup> Shanghai Public Health Clinical Center & Institutes of Biomedical Sciences, Shanghai Medical College, Fudan University, Shanghai 201508, China

<sup>2</sup> Department of Medical Biotechnology, Yeungnam University, Gyeongsan 38541, South Korea

<sup>3</sup> Research Institute of Cell Culture, Yeungnam University, Gyeongsan 38541, South Korea

<sup>4</sup> Department of Orthopedic Surgery, Yeungnam University Medical Center, 170, Hyeonchung-ro, Nam-gu, Daegu 42415, South Korea.

\* Correspondence: Chan Ho Park, orthoparkch@yu.ac.kr; Tel.: +82-053-620-3643 and Jun-O Jin, [jinho@yu.ac.kr](mailto:jinho@yu.ac.kr); Tel.: +82-053-810-3033

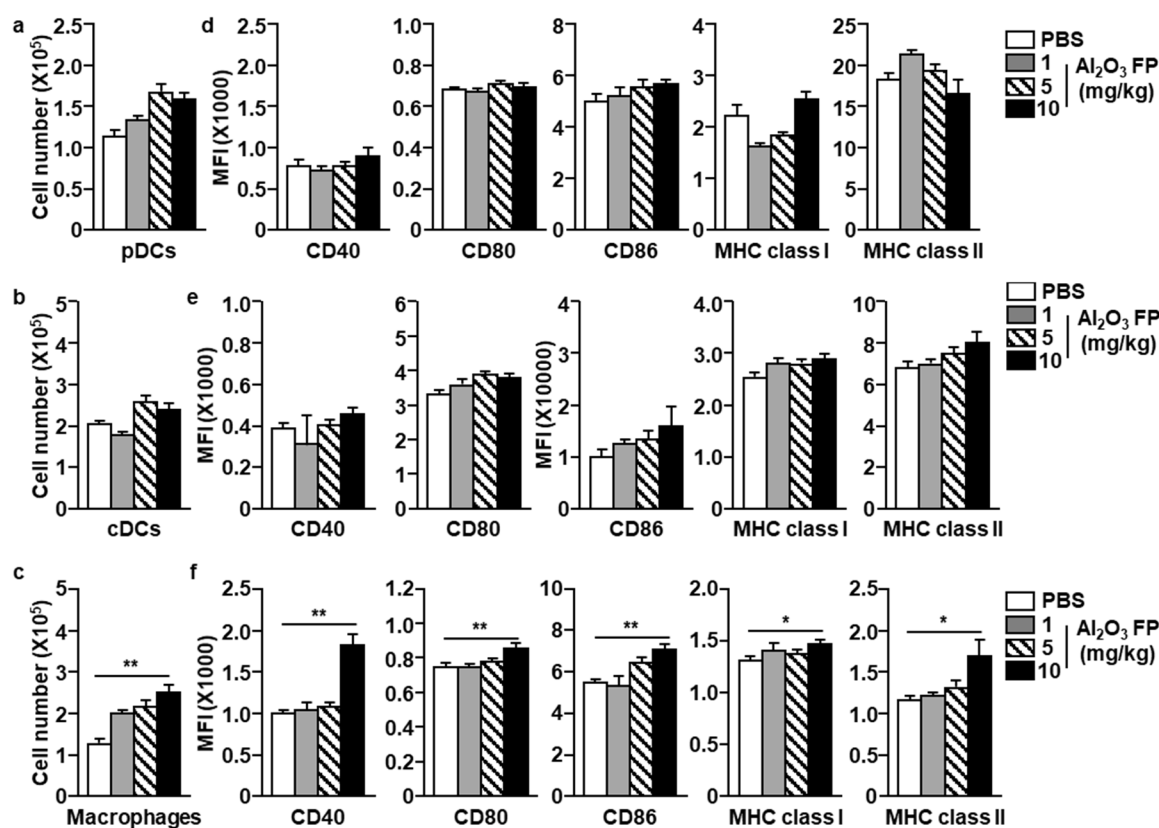

**Figure S1.** Dose dependent effect of Al<sub>2</sub>O<sub>3</sub> FPs in the activation of innate immune cells. C57BL/6 mice were *i.p.* injected with 1, 5 and 10 mg/kg of Al<sub>2</sub>O<sub>3</sub> FPs. Six hours after injection of Al<sub>2</sub>O<sub>3</sub> FPs, spleen was harvested and analyzed co-stimulators and MHC class I and II expression. The absolute numbers of (a) pDCs, (b) cDCs and (c) macrophages in the spleen. The expression levels of co-stimulator and MHC class I and II were shown in (d) pDCs, (e) cDCs and (f) macrophages.

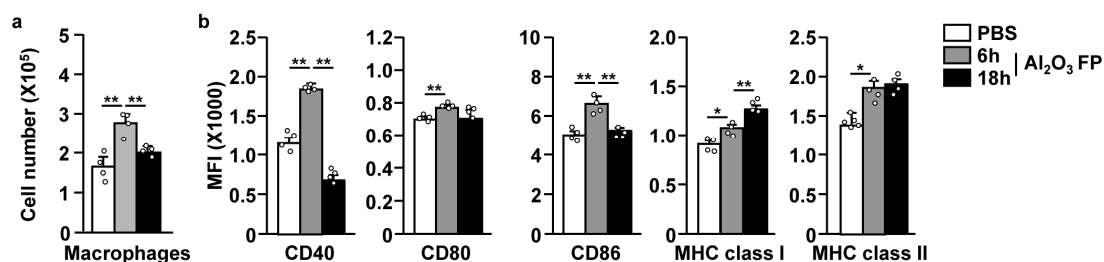

**Figure S2.** Time-dependent effect of  $\text{Al}_2\text{O}_3$  FPs in macrophage activation. C57BL/6 mice were *i.p.* injected with 10 mg/kg of  $\text{Al}_2\text{O}_3$  FPs. Six and eighteen hours after injection, the macrophage activation was analyzed. (a) The absolute number of macrophages analyzed in the spleen. (b) The expression levels of co-stimulator and MHC class I and II were shown in macrophages. The data are averages of four independent samples (2 mice for two experiments, two-way ANOVA, mean  $\pm$  SEM).

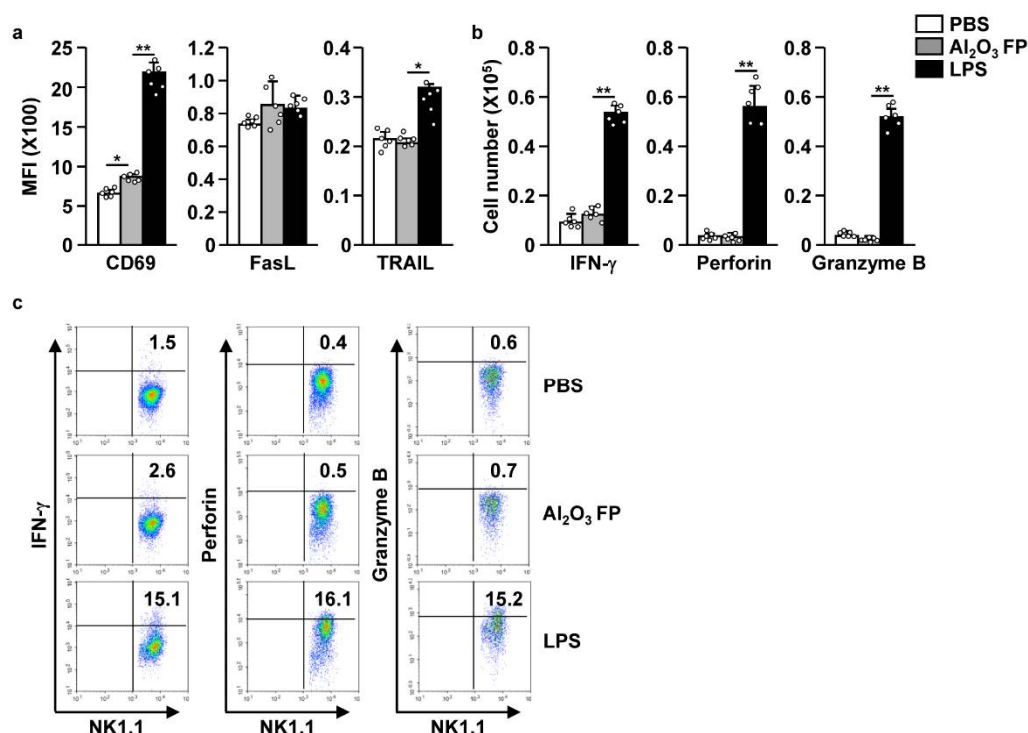

**Figure S3.**  $\text{Al}_2\text{O}_3$  FPs did not induce the activation of NK cells in the mice. C57BL/6 mice were *i.p.* injected with 10 mg/kg of  $\text{Al}_2\text{O}_3$  FPs for 6 h. The NK cells were defined as CD3-NK1.1<sup>+</sup> cells in live leukocytes as shown in figure 2b. (a) The expression levels of CD69, Fas ligand (FasL), and TNF-related apoptosis-inducing ligand (TRAIL) are shown in NK cells as mean fluorescence intensity (MFI). (2 mice pre 3 experiments, n = 6). (b) The number of IFN- $\gamma$ , Perforin-, and Granzyme B-producing NK cells. (c) The percentages of IFN- $\gamma$ , Perforin-, and Granzyme B-producing NK cells (2 mice per 3 experiments, n = 6).

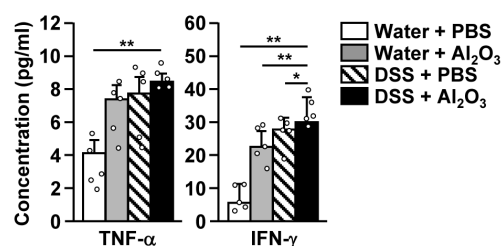

**Figure S4.** The serum concentrations of TNF- $\alpha$  and IFN- $\gamma$ . The mice were treated as indicated in figure 5. The serum concentrations of TNF- $\alpha$  and IFN- $\gamma$  were measured in triplicates by ELISA.
